# Supplementary material for: Comparison of Psoriatic Arthritis and Rheumatoid Arthritis Patients across Body Mass Index Categories in Switzerland
Source: MDPI journal article supplement (doi:10.3390/jcm10143194), 2021-07-20
Supplement: s1 [file s1]

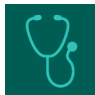

Supplementary Material

# Comparison of Psoriatic Arthritis and Rheumatoid Arthritis Patients across Body Mass Index Categories in Switzerland

Enriqueta Vallejo-Yagüe <sup>1</sup>, Theresa Burkard <sup>1</sup>, Burkhard Möller <sup>2</sup>, Axel Finckh <sup>3</sup> and Andrea M. Burden <sup>1,\*</sup>

<sup>1</sup> Department of Chemistry and Applied Biosciences, Institute of Pharmaceutical Sciences, ETH Zurich, CH-8093 Zurich, Switzerland; enriqueta.vallejo@pharma.ethz.ch (E.V.-Y.); theresa.burkard@pharma.ethz.ch (T.B.)

<sup>2</sup> Rheumatology, Immunology and Allergy, Inselspital, University Hospital of Bern, CH-3010 Bern, Switzerland; burkhard.moeller@insel.ch

<sup>3</sup> Division of Rheumatology, University Hospitals of Geneva, CH-1206 Geneva, Switzerland; axel.finckh@hcuge.ch

\* Correspondence: Correspondence: andrea.burden@pharma.ethz.ch; Tel.: +41-76-685-22-56

## Supplementary Equations

$$BMI = \frac{\text{weight Kg}}{\text{height m}^2} \quad (S1)$$

$$DAS28_{esr} = (0.56 \times \sqrt{tjc28} + 0.28 \times \sqrt{sjc28} + 0.7 \times \ln(esr)) \times 1.08 + 0.16 \quad (S2)$$

$$DAS28_{crp} = (0.56 \times \sqrt{tjc28} + 0.28 \times \sqrt{sjc28} + 0.36 \times \ln(crp + 1)) \times 1.10 + 1.15 \quad (S3)$$

$$DAPSA = sjc66 + tjc68 + PatActivity + PatPain + crp \quad (S4)$$

$$cDAPSA = sjc66 + tjc68 + PatActivity + PatPain \quad (S5)$$

$$MDA \text{ is achieved if at least 5 of the following items score positive: PatActivity } (<2); PatPain (<1.5); HAQ (\leq 0.5); sjc (\leq 1); tjc (\leq 1); entheses (\leq 1); \text{Skin manifestation none or almost none.} \quad (S6)$$

Abbreviations used in the above equations: BMI body mass index; DAS28 Disease Activity Score 28; DAPSA Disease Activity in Psoriasis Arthritis score; cDAPSA clinical DAPSA; MDA Minimal Disease Activity; swc28 Number of swollen joints, counting 28; swc66 Number of swollen joints, counting 66; tjc28 Number of tender joints, counting 28; tjc68 Number of tender joints, counting 68; esr Erythrocyte sedimentation rate; crp C-reactive protein (mg/dl); PatActivity Patient's assessment of disease activity on average the last 24 h (0 very well - 10 very poor); PatPain Patient's assessment of joint pain on average the last 24 h (0 very well - 10 very poor).

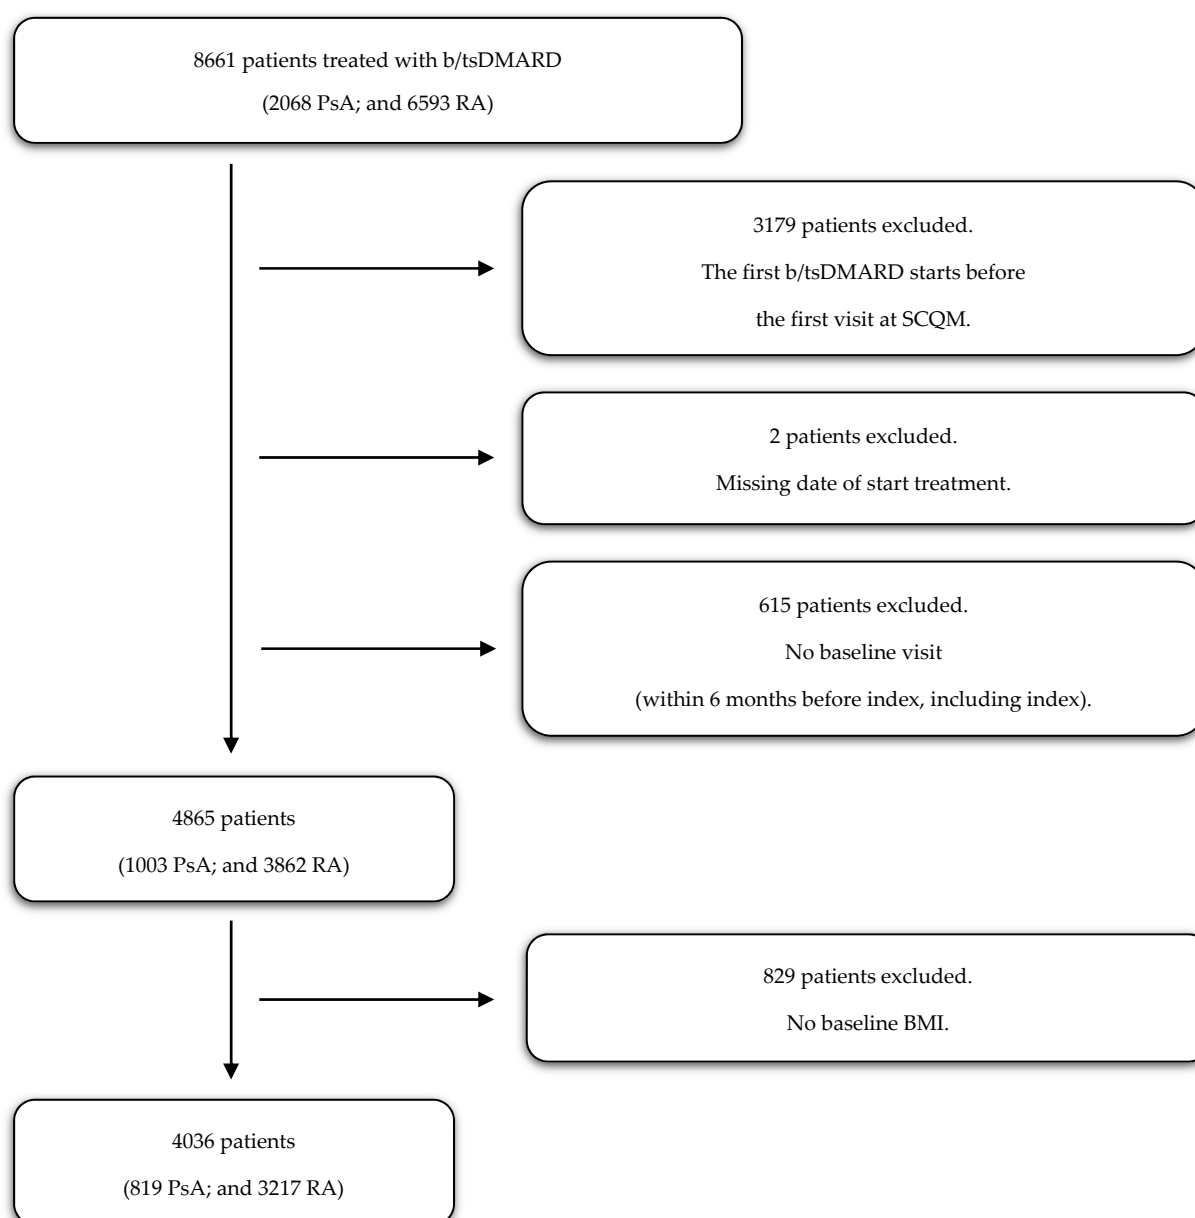

**Supplementary Figure S1.** Flow chart reflecting the patient inclusion process. Abbreviations: PsA psoriatic arthritis; RA rheumatoid arthritis; b/tsDMARD biologic or targeted synthetic disease modifying anti-rheumatic drug; SCQM Swiss Clinical Quality Management in Rheumatic Diseases; BMI body mass index.

**Supplementary Table S1.** Characteristics of psoriatic arthritis (PsA) patients starting their first biologic or targeted synthetic disease-modifying anti-rheumatic drug (b/tsDMARD) treatment. Additional variables to complement Table 2 and Table 3.

|                                                          | Normal Weight<br>(n = 325) | Overweight<br>(n = 299) | p     | Obese<br>(n = 195) | p      |
|----------------------------------------------------------|----------------------------|-------------------------|-------|--------------------|--------|
| Family history                                           | 138 (42.46)                | 114 (38.13)             | 0.307 | 73 (37.44)         | 0.299  |
| Smoker                                                   | 82 (25.23)                 | 92 (30.77)              | 0.292 | 54 (27.69)         | 0.911  |
| missing                                                  | 175 (53.85)                | 149 (49.83)             |       | 99 (50.77)         |        |
| Alcohol                                                  | 12 (3.69)                  | 20 (6.69)               | 0.173 | 8 (4.10)           | 1.000  |
| missing                                                  | 166 (51.08)                | 143 (47.83)             |       | 96 (49.23)         |        |
| Schooling                                                |                            |                         | 0.001 |                    | 0.006  |
| compulsory school                                        | 49 (15.08)                 | 64 (21.4)               |       | 43 (22.05)         |        |
| vocational training                                      | 134 (41.23)                | 137 (45.82)             |       | 81 (41.54)         |        |
| university studies                                       | 83 (25.54)                 | 43 (14.38)              |       | 28 (14.36)         |        |
| missing                                                  | 59 (18.15)                 | 55 (18.39)              |       | 43 (22.05)         |        |
| Daily time walking/bicycling/similar activities outdoors |                            |                         | 0.143 |                    | 0.007  |
| none                                                     | 5 (1.54)                   | 10 (3.34)               |       | 11 (5.64)          |        |
| <30min                                                   | 40 (12.31)                 | 53 (17.73)              |       | 36 (18.46)         |        |
| 30to60min                                                | 72 (22.15)                 | 57 (19.06)              |       | 32 (16.41)         |        |
| >60min                                                   | 41 (12.62)                 | 37 (12.37)              |       | 20 (10.26)         |        |
| missing                                                  | 167 (51.38)                | 142 (47.49)             |       | 96 (49.23)         |        |
| Power sports                                             |                            |                         | 0.019 |                    | <0.001 |
| none                                                     | 45 (13.85)                 | 70 (23.41)              |       | 56 (28.72)         |        |
| <1h                                                      | 32 (9.85)                  | 26 (8.7)                |       | 18 (9.23)          |        |
| 1to2h                                                    | 53 (16.31)                 | 35 (11.71)              |       | 18 (9.23)          |        |
| >2h                                                      | 30 (9.23)                  | 26 (8.7)                |       | 6 (3.08)           |        |
| missing                                                  | 165 (50.77)                | 142 (47.49)             |       | 97 (49.74)         |        |
| Index year (mean (SD))                                   | 2011.46 (4.31)             | 2011.69 (3.99)          | 0.478 | 2012.12 (4.20)     | 0.087  |
| Reason for 1 <sup>st</sup> b/tsDMARD stop                |                            |                         | 0.382 |                    | 0.024  |
| adverse event                                            | 29 (8.92)                  | 31 (10.37)              |       | 25 (12.82)         |        |
| not effective                                            | 72 (22.15)                 | 83 (27.76)              |       | 46 (23.59)         |        |
| remission                                                | 16 (4.92)                  | 16 (5.35)               |       | 1 (0.51)           |        |
| other/missing                                            | 58 (17.85)                 | 43 (14.38)              |       | 31 (15.9)          |        |
| not info on stop date                                    | 150 (46.15)                | 126 (42.14)             |       | 92 (47.18)         |        |

Values are the number and column percentage, unless otherwise specified. Significance tests compared the overweight and obese categories to the normal weight group using chi-squared test for categorical variables, and t-test for continuous variables. For the tests, missing values did not function as a grouping variable. Abbreviations: n—sample size; SD—Standard deviation.

**Supplementary Table S2.** Characteristics of rheumatoid arthritis (RA) patients starting their first biologic or targeted synthetic disease-modifying anti-rheumatic drug (b/tsDMARD) treatment. Additional variables to complement Table 5 and Table 6.

|                                                              | Normal Weight<br>(n = 1505) | Overweight<br>(n = 1024) | p      | Obese<br>(n = 546) | p      | Underweight<br>(n = 142) | p     |
|--------------------------------------------------------------|-----------------------------|--------------------------|--------|--------------------|--------|--------------------------|-------|
| Family history                                               | 337 (22.39)                 | 228 (22.27)              | 0.979  | 110 (20.15)        | 0.304  | 37 (26.06)               | 0.373 |
| Smoker                                                       | 412 (27.38)                 | 328 (32.03)              | 0.260  | 170 (31.14)        | 0.280  | 27 (19.01)               | 0.569 |
| missing                                                      | 822 (54.62)                 | 509 (49.71)              |        | 282 (51.65)        |        | 93 (65.49)               |       |
| Alcohol                                                      | 87 (5.78)                   | 67 (6.54)                | 0.660  | 23 (4.21)          | 0.252  | 7 (4.93)                 | 0.892 |
| missing                                                      | 495 (32.89)                 | 307 (29.98)              |        | 192 (35.16)        |        | 50 (35.21)               |       |
| Schooling                                                    |                             |                          | <0.001 |                    | <0.001 |                          | 0.022 |
| compulsory school                                            | 228 (15.15)                 | 237 (23.14)              |        | 139 (25.46)        |        | 10 (7.04)                |       |
| vocational training                                          | 612 (40.66)                 | 388 (37.89)              |        | 183 (33.52)        |        | 62 (43.66)               |       |
| university studies                                           | 170 (11.3)                  | 85 (8.3)                 |        | 31 (5.68)          |        | 21 (14.79)               |       |
| missing                                                      | 495 (32.89)                 | 314 (30.66)              |        | 193 (35.35)        |        | 49 (34.51)               |       |
| Daily time walking/bicycling/<br>similar activities outdoors |                             |                          | 0.495  |                    | 0.037  |                          | 0.077 |
| none                                                         | 127 (8.44)                  | 91 (8.89)                |        | 63 (11.54)         |        | 17 (11.97)               |       |
| <30min                                                       | 295 (19.6)                  | 210 (20.51)              |        | 97 (17.77)         |        | 17 (11.97)               |       |
| 30to60min                                                    | 388 (25.78)                 | 295 (28.81)              |        | 143 (26.19)        |        | 42 (29.58)               |       |
| >60min                                                       | 247 (16.41)                 | 154 (15.04)              |        | 69 (12.64)         |        | 21 (14.79)               |       |
| missing                                                      | 448 (29.77)                 | 274 (26.76)              |        | 174 (31.87)        |        | 45 (31.69)               |       |
| Power sports                                                 |                             |                          | 0.073  |                    | 0.007  |                          | 0.436 |
| none                                                         | 501 (33.29)                 | 393 (38.38)              |        | 201 (36.81)        |        | 53 (37.32)               |       |
| <1h                                                          | 174 (11.56)                 | 122 (11.91)              |        | 65 (11.9)          |        | 14 (9.86)                |       |
| 1to2h                                                        | 216 (14.35)                 | 141 (13.77)              |        | 71 (13)            |        | 15 (10.56)               |       |
| >2h                                                          | 159 (10.56)                 | 86 (8.4)                 |        | 31 (5.68)          |        | 12 (8.45)                |       |
| missing                                                      | 455 (30.23)                 | 282 (27.54)              |        | 178 (32.6)         |        | 48 (33.8)                |       |
| Index year (mean (SD))                                       | 2007.75 (5.09)              | 2008.52 (5.04)           | <0.001 | 2009.05 (4.86)     | <0.001 | 2006.36 (5.19)           | 0.002 |
| Reason for 1 <sup>st</sup> b/tsDMARD<br>stop                 |                             |                          | 0.111  |                    | 0.007  |                          | 0.562 |
| adverse event                                                | 148 (9.83)                  | 103 (10.06)              |        | 61 (11.17)         |        | 9 (6.34)                 |       |
| not effective                                                | 297 (19.73)                 | 214 (20.9)               |        | 125 (22.89)        |        | 25 (17.61)               |       |
| remission                                                    | 57 (3.79)                   | 45 (4.39)                |        | 28 (5.13)          |        | 7 (4.93)                 |       |
| other/missing                                                | 354 (23.52)                 | 195 (19.04)              |        | 93 (17.03)         |        | 26 (18.31)               |       |
| not info on stop date                                        | 649 (43.12)                 | 467 (45.61)              |        | 239 (43.77)        |        | 75 (52.82)               |       |

Values are the number and column percentage, unless otherwise specified. Significance tests compared the underweight, overweight and obese categories to the normal weight group using chi-squared test for categorical variables, and t-test for continuous variables. For the tests, missing values did not function as a grouping variable. Abbreviations: n—sample size; SD—Standard deviation.

**Supplementary Table S3.** First and second biologic or targeted synthetic disease-modifying anti-rheumatic drug (b/tsDMARD) treatment among the psoriatic arthritis (PsA) patients. Only those PsA patients with recorded information on both treatments were included.

| 1 <sup>st</sup> biologic/tsDMARD | 2 <sup>nd</sup> biologic/tsDMARD | Normal Weight<br>(n = 155) | Overweight<br>(n = 140) | Obese<br>(n = 90) |
|----------------------------------|----------------------------------|----------------------------|-------------------------|-------------------|
| <b>adalimumab (n (%))</b>        |                                  | <b>54 (34.84)</b>          | <b>62 (44.29)</b>       | <b>34 (37.78)</b> |
| adalimumab                       | adalimumab                       | 12 (22.22)                 | 13 (20.97)              | 5 (14.71)         |
| adalimumab                       | etanercept                       | 14 (25.93)                 | 17 (27.42)              | 11 (32.35)        |
| adalimumab                       | infliximab                       | 7 (12.96)                  | 7 (11.29)               | 3 (8.82)          |
| adalimumab                       | certolizumab                     | -                          | 5 (8.06)                | 2 (5.88)          |
| adalimumab                       | golimumab                        | 10 (18.52)                 | 12 (19.35)              | 9 (26.47)         |
| adalimumab                       | abatacept                        | 1 (1.85)                   | -                       | -                 |
| adalimumab                       | secukinumab                      | 4 (7.41)                   | 1 (1.61)                | 1 (2.94)          |
| adalimumab                       | ixekizumab                       | 1 (1.85)                   | 1 (1.61)                | -                 |
| adalimumab                       | ustekinumab                      | 4 (7.41)                   | -                       | 2 (5.88)          |
| adalimumab                       | apremilast                       | 1 (1.85)                   | 6 (9.68)                | 1 (2.94)          |
| <b>etanercept (n (%))</b>        |                                  | <b>56 (36.13)</b>          | <b>29 (20.71)</b>       | <b>30 (33.33)</b> |
| etanercept                       | adalimumab                       | 27 (48.21)                 | 10 (34.48)              | 14 (46.67)        |
| etanercept                       | etanercept                       | 10 (17.86)                 | 6 (20.69)               | 3 (10.00)         |
| etanercept                       | infliximab                       | 8 (14.29)                  | 1 (3.45)                | 1 (3.33)          |
| etanercept                       | certolizumab                     | 2 (3.57)                   | -                       | -                 |
| etanercept                       | golimumab                        | 6 (10.71)                  | 7 (24.14)               | 9 (30.00)         |
| etanercept                       | tocilizumab                      | -                          | 1 (3.45)                | -                 |
| etanercept                       | secukinumab                      | -                          | 2 (6.90)                | -                 |
| etanercept                       | ustekinumab                      | -                          | 1 (3.45)                | 3 (10.00)         |
| etanercept                       | apremilast                       | 3 (5.36)                   | 1 (3.45)                | -                 |
| <b>infliximab (n (%))</b>        |                                  | <b>16 (10.32)</b>          | <b>20 (14.29)</b>       | <b>7 (7.78)</b>   |
| infliximab                       | adalimumab                       | 6 (37.50)                  | 6 (30)                  | 2 (28.57)         |
| infliximab                       | etanercept                       | 3 (18.75)                  | 4 (20)                  | -                 |
| infliximab                       | infliximab                       | 1 (6.25)                   | 4 (20)                  | 3 (42.86)         |
| infliximab                       | golimumab                        | 5 (31.25)                  | 4 (20)                  | 2 (28.57)         |
| infliximab                       | abatacept                        | -                          | 1 (5)                   | -                 |
| infliximab                       | ustekinumab                      | 1 (6.25)                   | 1 (5)                   | -                 |
| <b>certolizumab (n (%))</b>      |                                  | <b>3 (1.94)</b>            | <b>2 (1.43)</b>         | <b>4 (4.44)</b>   |
| certolizumab                     | etanercept                       | 1 (33.33)                  | 2 (100)                 | 1 (25.00)         |
| certolizumab                     | golimumab                        | 1 (33.33)                  | -                       | 2 (50.00)         |
| certolizumab                     | ustekinumab                      | -                          | -                       | 1 (25.00)         |
| certolizumab                     | apremilast                       | 1 (33.33)                  | -                       | -                 |
| <b>golimumab (n (%))</b>         |                                  | <b>18 (11.61)</b>          | <b>20 (14.29)</b>       | <b>6 (6.67)</b>   |
| golimumab                        | adalimumab                       | 3 (16.67)                  | 6 (30)                  | 2 (33.33)         |
| golimumab                        | etanercept                       | 2 (11.11)                  | 3 (15)                  | 2 (33.33)         |
| golimumab                        | infliximab                       | 1 (5.56)                   | 2 (10)                  | -                 |
| golimumab                        | certolizumab                     | 2 (11.11)                  | 1 (5)                   | -                 |
| golimumab                        | golimumab                        | 3 (16.67)                  | 4 (20)                  | 1 (16.67)         |
| golimumab                        | secukinumab                      | -                          | 1 (5)                   | -                 |
| golimumab                        | ixekizumab                       | 1 (5.56)                   | -                       | -                 |
| golimumab                        | ustekinumab                      | 5 (27.78)                  | -                       | -                 |
| golimumab                        | apremilast                       | 1 (5.56)                   | 3 (15)                  | 1 (16.67)         |
| <b>abatacept (n (%))</b>         |                                  | <b>1 (0.65)</b>            | <b>1 (0.71)</b>         | <b>0 (0)</b>      |
| abatacept                        | infliximab                       | 1 (100.00)                 | -                       | -                 |
| abatacept                        | tocilizumab                      | -                          | 1 (100)                 | -                 |

|                            |             |                 |                 |                 |
|----------------------------|-------------|-----------------|-----------------|-----------------|
| <b>tocilizumab (n (%))</b> |             | -               | <b>1 (0.71)</b> | -               |
| tocilizumab                | infliximab  | -               | 1 (100)         | -               |
| <b>secukinumab (n (%))</b> |             | <b>1 (0.65)</b> | <b>1 (0.71)</b> | <b>2 (2.22)</b> |
| secukinumab                | infliximab  | 1 (100)         | -               | -               |
| secukinumab                | golimumab   | -               | -               | 1 (50)          |
| secukinumab                | ixekizumab  | -               | 1 (100)         | -               |
| secukinumab                | tofacitinib | -               | -               | 1 (50)          |
| <b>ustekinumab (n (%))</b> |             | <b>1 (0.65)</b> | <b>1 (0.71)</b> | <b>0 (0)</b>    |
| ustekinumab                | adalimumab  | 1 (100)         | -               | -               |
| ustekinumab                | etanercept  | -               | 1 (100)         | -               |
| <b>apremilast (n (%))</b>  |             | <b>5 (3.23)</b> | <b>3 (2.14)</b> | <b>7 (7.78)</b> |
| apremilast                 | adalimumab  | 3 (60)          | -               | 3 (42.86)       |
| apremilast                 | etanercept  | -               | -               | 2 (28.57)       |
| apremilast                 | golimumab   | -               | -               | 1 (14.29)       |
| apremilast                 | secukinumab | 1 (20)          | 2 (66.67)       | -               |
| apremilast                 | ustekinumab | -               | 1 (33.33)       | -               |
| apremilast                 | apremilast  | 1 (20)          | -               | 1 (14.29)       |

**Supplementary Table S4.** First and second biologic or targeted synthetic disease-modifying anti-rheumatic drug (b/tsDMARD) treatment among the rheumatoid arthritis (RA) patients. Only those RA patients with recorded information on both treatments were included.

| 1 <sup>st</sup> biologic/tsDMARD | 2 <sup>nd</sup> biologic/tsDMARD | Normal weight<br>(n = 749) | Overweight<br>(n = 479) | Obese<br>(n = 259) | Underweight<br>(n = 59) |
|----------------------------------|----------------------------------|----------------------------|-------------------------|--------------------|-------------------------|
| <b>adalimumab (n (%))</b>        |                                  | <b>228 (30.44)</b>         | <b>156 (32.57)</b>      | <b>82 (31.66)</b>  | <b>16 (27.12)</b>       |
| adalimumab                       | adalimumab                       | 32 (14.04)                 | 20 (12.82)              | 8 (9.76)           | 4 (25.00)               |
| adalimumab                       | etanercept                       | 63 (27.63)                 | 43 (27.56)              | 23 (28.05)         | 6 (37.50)               |
| adalimumab                       | infliximab                       | 19 (8.33)                  | 10 (6.41)               | 4 (4.88)           | -                       |
| adalimumab                       | certolizumab                     | 5 (2.19)                   | 2 (1.28)                | 3 (3.66)           | -                       |
| adalimumab                       | golimumab                        | 13 (5.70)                  | 13 (8.33)               | 5 (6.10)           | 4 (25.00)               |
| adalimumab                       | rituximab                        | 42 (18.42)                 | 19 (12.18)              | 15 (18.29)         | 1 (6.25)                |
| adalimumab                       | abatacept                        | 29 (12.72)                 | 17 (10.90)              | 13 (15.85)         | -                       |
| adalimumab                       | tocilizumab                      | 17 (7.46)                  | 26 (16.67)              | 5 (6.10)           | -                       |
| adalimumab                       | apremilast                       | 1 (0.44)                   | -                       | -                  | -                       |
| adalimumab                       | baricitinib                      | -                          | 1 (0.64)                | -                  | 1 (6.25)                |
| adalimumab                       | tofacitinib                      | 7 (3.07)                   | 5 (3.21)                | 6 (7.32)           | -                       |
| <b>etanercept (n (%))</b>        |                                  | <b>266 (35.51)</b>         | <b>156 (32.57)</b>      | <b>72 (27.8)</b>   | <b>22 (37.29)</b>       |
| etanercept                       | adalimumab                       | 102 (38.35)                | 58 (37.18)              | 30 (41.67)         | 11 (50.00)              |
| etanercept                       | etanercept                       | 34 (12.78)                 | 14 (8.97)               | 5 (6.94)           | 1 (4.55)                |
| etanercept                       | infliximab                       | 32 (12.03)                 | 18 (11.54)              | 8 (11.11)          | 4 (18.18)               |
| etanercept                       | certolizumab                     | 5 (1.88)                   | 3 (1.92)                | 1 (1.39)           | -                       |
| etanercept                       | golimumab                        | 11 (4.14)                  | 10 (6.41)               | 7 (9.72)           | -                       |
| etanercept                       | rituximab                        | 33 (12.41)                 | 17 (10.90)              | 10 (13.89)         | 1 (4.55)                |
| etanercept                       | abatacept                        | 16 (6.02)                  | 9 (5.77)                | 4 (5.56)           | 2 (9.09)                |
| etanercept                       | anakinra                         | -                          | 1 (0.64)                | -                  | -                       |
| etanercept                       | tocilizumab                      | 19 (7.14)                  | 15 (9.62)               | 1 (1.39)           | 3 (13.64)               |
| etanercept                       | baricitinib                      | 2 (0.75)                   | -                       | 1 (1.39)           | -                       |
| etanercept                       | tofacitinib                      | 12 (4.51)                  | 11 (7.05)               | 5 (6.94)           | -                       |
| <b>infliximab (n (%))</b>        |                                  | <b>139 (18.56)</b>         | <b>87 (18.16)</b>       | <b>40 (15.44)</b>  | <b>16 (27.12)</b>       |
| infliximab                       | adalimumab                       | 45 (32.37)                 | 28 (32.18)              | 16 (40)            | 9 (56.25)               |
| infliximab                       | etanercept                       | 29 (20.86)                 | 17 (19.54)              | 4 (10)             | 3 (18.75)               |
| infliximab                       | infliximab                       | 16 (11.51)                 | 9 (10.34)               | -                  | 1 (6.25)                |
| infliximab                       | certolizumab                     | 1 (0.72)                   | -                       | -                  | -                       |
| infliximab                       | golimumab                        | 4 (2.88)                   | 5 (5.75)                | 1 (2.5)            | -                       |
| infliximab                       | rituximab                        | 15 (10.79)                 | 14 (16.09)              | 10 (25)            | 1 (6.25)                |
| infliximab                       | abatacept                        | 15 (10.79)                 | 5 (5.75)                | 5 (12.5)           | -                       |
| infliximab                       | tocilizumab                      | 13 (9.35)                  | 9 (10.34)               | 4 (10)             | 2 (12.5)                |
| infliximab                       | tofacitinib                      | 1 (0.72)                   | -                       | -                  | -                       |
| <b>certolizumab (n (%))</b>      |                                  | <b>16 (2.14)</b>           | <b>6 (1.25)</b>         | <b>7 (2.7)</b>     | <b>0 (0)</b>            |
| certolizumab                     | adalimumab                       | 1 (6.25)                   | -                       | -                  | -                       |
| certolizumab                     | etanercept                       | 3 (18.75)                  | 2 (33.33)               | 1 (14.29)          | -                       |
| certolizumab                     | infliximab                       | 2 (12.50)                  | -                       | -                  | -                       |
| certolizumab                     | certolizumab                     | 2 (12.50)                  | 1 (16.67)               | 1 (14.29)          | -                       |
| certolizumab                     | golimumab                        | -                          | -                       | 1 (14.29)          | -                       |
| certolizumab                     | rituximab                        | 1 (6.25)                   | -                       | -                  | -                       |
| certolizumab                     | abatacept                        | 2 (12.50)                  | 1 (16.67)               | 2 (28.57)          | -                       |
| certolizumab                     | tocilizumab                      | 2 (12.50)                  | 1 (16.67)               | 1 (14.29)          | -                       |
| certolizumab                     | ixekizumab                       | -                          | -                       | 1 (14.29)          | -                       |
| certolizumab                     | baricitinib                      | 1 (6.25)                   | -                       | -                  | -                       |
| certolizumab                     | tofacitinib                      | 2 (12.5)                   | 1 (16.67)               | -                  | -                       |

|                            |              |                  |                  |                  |                 |
|----------------------------|--------------|------------------|------------------|------------------|-----------------|
| <b>golimumab (n (%))</b>   |              | <b>40 (5.34)</b> | <b>22 (4.59)</b> | <b>23 (8.88)</b> | <b>3 (5.08)</b> |
| golimumab                  | adalimumab   | 6 (15)           | 1 (4.55)         | 2 (8.70)         | -               |
| golimumab                  | etanercept   | 8 (20)           | 4 (18.18)        | 4 (17.39)        | 1 (33.33)       |
| golimumab                  | infliximab   | 2 (5)            | 2 (9.09)         | 2 (8.70)         | -               |
| golimumab                  | certolizumab | -                | 2 (9.09)         | 1 (4.35)         | -               |
| golimumab                  | golimumab    | 7 (17.5)         | 2 (9.09)         | 3 (13.04)        | 1 (33.33)       |
| golimumab                  | rituximab    | 1 (2.5)          | 2 (9.09)         | 2 (8.70)         | -               |
| golimumab                  | abatacept    | 8 (20)           | 3 (13.64)        | 3 (13.04)        | -               |
| golimumab                  | tocilizumab  | 4 (10)           | 6 (27.27)        | 3 (13.04)        | 1 (33.33)       |
| golimumab                  | tofacitinib  | 4 (10)           | -                | 3 (13.04)        | -               |
| <b>rituximab (n (%))</b>   |              | <b>11 (1.47)</b> | <b>7 (1.46)</b>  | <b>4 (1.54)</b>  | <b>0 (0)</b>    |
| rituximab                  | adalimumab   | 2 (18.18)        | 1 (14.29)        | -                | -               |
| rituximab                  | etanercept   | 1 (9.09)         | 1 (14.29)        | -                | -               |
| rituximab                  | infliximab   | -                | 1 (14.29)        | -                | -               |
| rituximab                  | certolizumab | 1 (9.09)         | -                | -                | -               |
| rituximab                  | rituximab    | 4 (36.36)        | 3 (42.86)        | 1 (25)           | -               |
| rituximab                  | abatacept    | -                | -                | 2 (50)           | -               |
| rituximab                  | tocilizumab  | 2 (18.18)        | -                | -                | -               |
| rituximab                  | baricitinib  | -                | 1 (14.29)        | -                | -               |
| rituximab                  | tofacitinib  | 1 (9.09)         | -                | 1 (25)           | -               |
| <b>abatacept (n (%))</b>   |              | <b>23 (3.07)</b> | <b>21 (4.38)</b> | <b>19 (7.34)</b> | <b>1 (1.69)</b> |
| abatacept                  | adalimumab   | 1 (4.35)         | -                | -                | -               |
| abatacept                  | etanercept   | 2 (8.70)         | 5 (23.81)        | 1 (5.26)         | -               |
| abatacept                  | infliximab   | 1 (4.35)         | -                | 1 (5.26)         | -               |
| abatacept                  | golimumab    | -                | 2 (9.52)         | 2 (10.53)        | 1 (100)         |
| abatacept                  | rituximab    | 4 (17.39)        | 4 (19.05)        | 2 (10.53)        | -               |
| abatacept                  | abatacept    | 7 (30.43)        | 2 (9.52)         | 4 (21.05)        | -               |
| abatacept                  | tocilizumab  | 6 (26.09)        | 7 (33.33)        | 6 (31.58)        | -               |
| abatacept                  | baricitinib  | -                | 1 (4.76)         | 1 (5.26)         | -               |
| abatacept                  | tofacitinib  | 2 (8.70)         | -                | 2 (10.53)        | -               |
| <b>tocilizumab (n (%))</b> |              | <b>19 (2.54)</b> | <b>17 (3.55)</b> | <b>7 (2.70)</b>  | <b>1 (1.69)</b> |
| tocilizumab                | adalimumab   | 2 (10.53)        | 1 (5.88)         | 2 (28.57)        | -               |
| tocilizumab                | etanercept   | 1 (5.26)         | 2 (11.76)        | -                | -               |
| tocilizumab                | certolizumab | 1 (5.26)         | -                | -                | -               |
| tocilizumab                | golimumab    | -                | 3 (17.65)        | -                | -               |
| tocilizumab                | rituximab    | 3 (15.79)        | -                | 2 (28.57)        | -               |
| tocilizumab                | abatacept    | 5 (26.32)        | 2 (11.76)        | 2 (28.57)        | 1 (100)         |
| tocilizumab                | tocilizumab  | 4 (21.05)        | 4 (23.53)        | 1 (14.29)        | -               |
| tocilizumab                | baricitinib  | -                | 1 (5.88)         | -                | -               |
| tocilizumab                | tofacitinib  | 3 (15.79)        | 4 (23.53)        | -                | -               |
| <b>tofacitinib (n (%))</b> |              | <b>7 (0.93)</b>  | <b>7 (1.46)</b>  | <b>5 (1.93)</b>  | <b>0 (0)</b>    |
| tofacitinib                | adalimumab   | 1 (14.29)        | -                | 1 (20)           | -               |
| tofacitinib                | certolizumab | -                | 1 (14.29)        | -                | -               |
| tofacitinib                | golimumab    | 2 (28.57)        | 1 (14.29)        | 2 (40)           | -               |
| tofacitinib                | rituximab    | 1 (14.29)        | -                | -                | -               |
| tofacitinib                | abatacept    | 1 (14.29)        | 1 (14.29)        | -                | -               |
| tofacitinib                | tocilizumab  | 1 (14.29)        | 3 (42.86)        | -                | -               |
| tofacitinib                | baricitinib  | 1 (14.29)        | -                | 1 (20)           | -               |
| tofacitinib                | tofacitinib  | -                | 1 (14.29)        | 1 (20)           | -               |



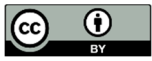

**Copyright:** © 2021 by the authors. Licensee MDPI, Basel, Switzerland. This article is an open access article distributed under the terms and conditions of the Creative Commons Attribution (CC BY) license (<http://creativecommons.org/licenses/by/4.0/>).
